# Supplementary material
Source: Springer Nature journal article supplement (https://www.springermedizin.de/resource/supplementary/13023_2013_891_MOESM3_ESM.pdf/9642920)
Supplement: MOESM3 [file 9642920]

**Table 2. Epilepsy history of the 9 ARX patients with epilepsy.**

| <b>Patient</b>    | <b>Type of seizure</b>                                                                                                                             | <b>Age at onset</b>                                                                                        | <b>Frequency and circumstances of seizures</b>                           | <b>EEG</b>                                                              | <b>medications</b>                                            | <b>Outcome of epilepsy</b>                                                                | <b>Severity of cognitive deficit</b> |
|-------------------|----------------------------------------------------------------------------------------------------------------------------------------------------|------------------------------------------------------------------------------------------------------------|--------------------------------------------------------------------------|-------------------------------------------------------------------------|---------------------------------------------------------------|-------------------------------------------------------------------------------------------|--------------------------------------|
| 1<br>(Family I)   | <b>Infantile spasms</b>                                                                                                                            | 4 months                                                                                                   | daily                                                                    | hypersyhythmia                                                          | GVG, HC<br>Topiramate                                         | At 20 months: free of seizure and meds                                                    | Moderate                             |
| 2<br>(Family III) | Partial complex                                                                                                                                    | 4 years and 4 months                                                                                       | Total of 8 seizures<br>(1 watching TV)                                   | Occipitotemporal spikes & slow waves, generalized spike wave discharges | VPA                                                           | At 17 years and 9 months: free of seizures on VPA                                         | Moderate                             |
| 3<br>(Family V)   | - <b>Infantile spasms</b><br>- Febrile status epilepticus<br>- generalized tonic clonic seizure<br>- partial seizure                               | - 5 months<br>- 14 years and 9 months<br>- 17 years and 3 months<br>- 17 years and 7 months                | - daily<br>- Rare generalized tonic clonic seizures                      | hypersyhythmia                                                          | ACTH, CZP<br>VPA                                              | At 18 years and 8 months: last seizure at 17 years 7 months old, on VPA CZP               | <b>profound</b>                      |
| 4<br>(Family VII) | Short febrile tonic clonic<br>(once without fever)                                                                                                 | 3 years and 4 months                                                                                       | Total of 3 seizures within six months                                    | normal                                                                  | VPA                                                           | At 4 years and 6 months: free of seizures on VPA                                          | Moderate                             |
| 5<br>(Family X)   | - <b>Infantile spasms</b><br>- partial complex seizures<br>- nocturnal tonic-clonic<br>- generalized tonic-clonic seizures<br>- status epilepticus | - 7 months<br>- 22 months<br><br>- 3 years and 2 months<br>- 5 years and 8 months<br>- 6 years and 1 month | - Daily<br>- Twice a week<br><br>- Once a week<br><br>- every two months | Na                                                                      | - HC ACTH<br>- CBZ<br><br>- GVG<br><br>- VPA<br><br>- LTG LVT | At 11 years and 4 months: generalized tonic clonic seizure once a month, on VPA, LTG, LVT | <b>profound</b>                      |
| 6<br>(Family XI)  | Absences                                                                                                                                           | 4 years                                                                                                    | Some watching TV                                                         | Na                                                                      | VPA                                                           | At 11 years and 10 months: free of seizures and meds                                      | Moderate                             |
| 7<br>(Family XI)  | - Febrile seizure<br>- Absences                                                                                                                    | - 14 months<br>- 7 years and 9 months                                                                      | watching TV                                                              | Na                                                                      | no                                                            | At 7 years and 11 months: free of seizures and meds                                       | Moderate                             |
| 8<br>(Family XII) | ?                                                                                                                                                  | 14 years                                                                                                   |                                                                          |                                                                         | Ethosuccimide<br>VPA, CLB                                     | At 54 years: occasionally                                                                 | severe                               |

|                   |                                                                                |                              |                                     |                       |                     |                                                          |        |
|-------------------|--------------------------------------------------------------------------------|------------------------------|-------------------------------------|-----------------------|---------------------|----------------------------------------------------------|--------|
| 9<br>(Family XII) | - Hypotonic seizures<br>- Tonic seizures with eye rolling, pallor and cyanosis | - 22 months<br><br>- 5 years | - once<br><br>- 2 to 3 times a week | Normal at 4 years old | - VPA<br>CBZ<br>CLB | At 18 years and 6 months: free of seizures on VPA<br>CBZ | severe |
|-------------------|--------------------------------------------------------------------------------|------------------------------|-------------------------------------|-----------------------|---------------------|----------------------------------------------------------|--------|

CBZ: carbamazepin; CZP: clonazepam; CLB: clobazam; LTG: lamotrigin; VPA: valproate; GVG: vigabatrin; LVT: levetiracetam; HC: hydrocortisone.
